# Supplementary material for: A Facile Synthesis of (PIM-Polyimide)-(6FDA-Durene-Polyimide) Copolymer as Novel Polymer Membranes for CO2 Separation
Source: PubMed Central journal article supplement (PMC6780089; doi:10.3390/membranes9090113), 2019-08-31
Supplement: membranes-09-00113-s001.pdf [file membranes-09-00113-s001.pdf]

Article

# Supplementary Materials: A Facile Synthesis of (PIM-Polyimide)-(6FDA-Durene-Polyimide) Copolymer as Novel Polymer Membranes for CO<sub>2</sub> Separation

Iqbal Hossain <sup>1,2</sup>, Abu Zafar Al Munsur <sup>1,2</sup> and Tae-Hyun Kim <sup>1,2,\*</sup>

<sup>1</sup> Organic Material Synthesis Laboratory, Department of Chemistry, Incheon National University, Incheon, 22012, Korea.

<sup>2</sup> Research Institute of Basic Sciences, Incheon National University, Incheon, 22012, Korea.

\* Correspondence: tkim@inu.ac.kr (T.-H. Kim); Tel. +82-32-8358232.

## S-1. Materials

4,4'-(Hexafluoroisopropylidene) di-phthalic anhydride (6FDA), 2,3,5,6-tetramethyl benzene-1,4-diamine (durene), and 4,5-dichloro phthalonitrile (98%), were purchased from Tokyo Chemical Industry (TCI) Co. Ltd. (Tokyo, Japan) and were used as obtained. 5,5',6,6'-Tetrahydroxy-3,3,3',3'-tetramethyl-1,10-spirobisindane (97%) was obtained from Alfa Aesar. Acetic anhydride, toluene, and triethylamine were obtained from Sigma Aldrich. Methanol, ethanol, dimethylformamide, dimethylacetamide, potassium carbonate, and potassium hydroxide were purchased from Daejung Chemicals & Metals Co. Ltd. in South Korea. 6FDA, durene, and K<sub>2</sub>CO<sub>3</sub> were dried under a vacuum at 60 °C for 24 h prior to use. Anhydride monomer of PIM (**An**) was synthesized following the literature method [22]. All chemicals, unless otherwise noted, were obtained from commercial sources and were used as received.

## S-2. Characterization and Measurements

The <sup>1</sup>H NMR spectra were obtained on an Agilent 400-MR (400 MHz) instrument using *d*<sub>6</sub>-DMSO or CDCl<sub>3</sub> as a reference or an internal deuterium lock.

The attenuated total reflection Fourier transform infrared (ATR-FTIR) spectra were recorded using a Bruker Vertex 80v Hyperion 2000 ATR-FTIR spectrometer.

Molar masses were determined by gel permeation chromatography (GPC) using two PL Gel 30 cm × 5 μm mixed C columns at 30 °C running in DMF and calibrated against polystyrene (*M*<sub>n</sub> = 600 × 10<sup>6</sup> g mol<sup>-1</sup>) standards using a Knauer refractive index detector.

The thermal stability of the membranes was analyzed by thermogravimetric analysis (TGA) measurements conducted on a Shimadzu TGA-2950 instrument at a heating rate of 10 °C min<sup>-1</sup> under a nitrogen flow.

The tensile properties were measured on a Shimadzu EZ-TEST E2-L instrument benchtop tensile tester using a crosshead speed of 5 mm.min<sup>-1</sup> at 25 °C under 50% relative humidity. The engineering stress was calculated from the initial cross-sectional area of the sample and Young's modulus (*E*) was determined from the initial slope of the stress-strain curve. The membrane samples were cut into rectangular shapes 40 mm × 10 mm (total) and 20 mm × 10 mm (test area) in size.

The densities of the membranes (g.cm<sup>-3</sup>) were determined experimentally using a top-loading electronic Mettler Toledo balance (XP205, Mettler-Toledo, Switzerland) coupled with a density kit based on the Archimedes principle. The samples were weighed in air and in a known-density liquid, high-purity heptane. The measurements were performed at room temperature using the buoyancy method, and the density was calculated as follows:

$$\rho_{polymer} = \frac{W_0}{W_0 - W_1} \cdot \rho_{liquid} \quad (S1)$$

where  $W_0$  and  $W_1$  are the membrane weights in air and in heptane respectively. Heptane sorption of the membranes was not considered due to their extremely low absorption properties.

The X-ray diffraction patterns of the membranes were measured using a Rigaku DMAX-2200H diffractometer operated at a scanning rate of  $4^\circ \text{ min}^{-1}$  in a  $2\theta$  range from  $5^\circ$  to  $30^\circ$  with  $\text{Cu K}\alpha_1$  X-ray radiation ( $\lambda = 0.1540598$ ). The  $d$ -spacings were calculated using Bragg's law ( $d = \lambda/2\sin\theta$ ).

Tapping-mode AFM was conducted using a Bruker MultiMode instrument. A silicone cantilever with an end radius of  $<10$  nm and a force constant of  $40 \text{ Nm}^{-1}$  (NCHR, nanosensors,  $f=300$  kHz) was used to image the samples at an ambient temperature.

### S-3. Gas Permeation Procedure

Permeation measurements of pure gas were taken using a high-vacuum time-lag measurement unit based on a constant-volume/variable-pressure method. All of the experiments were performed at a feed pressure of 2 bar (except for the pressure effect experiments which were carried out in the range of 100 mbar to 2 bar feed pressure) and a feed temperature of  $30^\circ \text{C}$ . Before taking these measurements, both the feed and the permeate sides were thoroughly evacuated to below  $10^{-5}$  Torr ( $1.33 \times 10^{-8}$  bar) until the readout showed zero values for the removal of any residual gases. The downstream volume was calibrated using a Kapton membrane and was found to be  $50 \text{ cm}^3$ . The upstream and downstream pressures were measured using a Baraton transducer (MKS; Model No. 626B02TBE) with a full scale of 10,000 and 2 Torr ( $13.3$  and  $2.7 \times 10^{-3}$  bar), respectively. The pressure on the permeate side was recorded as a function of time using a pressure transducer and passed to a desktop computer through a shielded data cable. The permeability coefficient was determined from the linear slope of the downstream pressure versus a time plot ( $dp/dt$ ) according to the following equation:

$$P = \frac{273}{76} \times \frac{Vl}{ATp_0} \times \frac{dp}{dt} \quad (\text{S2})$$

where,  $P$  is the permeability expressed in Barrer ( $1 \text{ Barrer} = 10^{-10} [\text{cm}^3 (\text{STP}) \text{ cm} \cdot \text{cm}^{-2} \cdot \text{s}^{-1} \cdot \text{cm}^{-1} \cdot \text{Hg}^{-1}]$ ),  $V$  ( $\text{cm}^3$ ) is the downstream volume,  $l$  (cm) is the membrane thickness,  $A$  ( $\text{cm}^2$ ) is the effective area of the membrane,  $T$  (K) is the measurement temperature,  $p_0$  (Torr) is the pressure of the feed gas in the upstream chamber, and  $dp/dt$  is the rate of the pressure change under a steady state. For each gas, the permeation tests were repeated more than three times, and the standard deviation from the mean values of the permeabilities was within ca.  $\pm 3\%$ . Sample-to-sample reproducibility was high and within  $\pm 3\%$ . The effective membrane areas were  $15.9 \text{ cm}^2$ . The ideal permselectivity,  $\alpha_{A/B}$ , of the membrane for a pair of gases (A and B) is defined as the ratio of the individual gas permeability coefficients:

$$\alpha_{A/B} = \frac{P_A}{P_B} \quad (\text{S3})$$

The diffusivity and solubility were obtained from the time-lag ( $\theta$ ) value according to the equations:

$$D = \frac{l^2}{6\theta} \quad (\text{S4})$$

$$S = \frac{P}{D} \quad (\text{S5})$$

where,  $D$  ( $\text{cm}^2 \text{ s}^{-1}$ ) is the diffusivity coefficient,  $l$  is the membrane thickness (cm) and  $\theta$  is the time lag (s), as obtained from the intercept of the linear steady-state part of the downstream pressure versus a time plot. The solubility,  $S$ , was calculated from Equation. (S5) with the permeability and diffusivity obtained from Equation. (S3) and (S4).

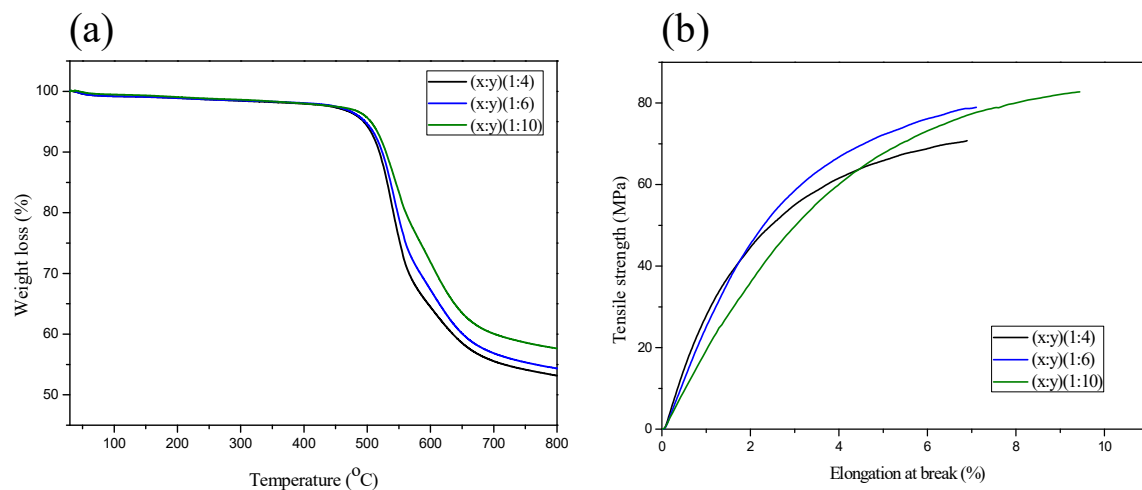

**Figure S1.** TGA graph (a) and S-S curve (b) of the copolymer [(PIM-PI)<sub>x</sub>-(6FDA-durene-PI)<sub>y</sub>] membranes.

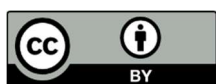

© 2019 by the authors. Submitted for possible open access publication under the terms and conditions of the Creative Commons Attribution (CC BY) license (<http://creativecommons.org/licenses/by/4.0/>).
